# Supplementary material for: Spatio-temporal snow data assimilation with the ICESat-2 laser altimeter
Source: Copernicus journal article supplement (doi:10.5194/egusphere-2024-1404), 2024-05-24
Supplement: Supplementary file [file egusphere-2024-1404-AC1-supplement.pdf]

## REVIEWER #1

### Major Comments:

#### COMMENT # 1.1

*The article presents the results of three data assimilation studies that incorporate (1) fractional snow-covered area from Sentinel-2, (2) snow depth from ICESat-2, and (3) both fractional snow-covered area and snow depth to determine which approach has the greatest improvement on modeled snow depths. The study is performed for a site in the Spanish Pyrenes where multiple drone-derived DEMs are available to assess the performance of the data-assimilated modeled outputs. The authors find that the inclusion of both fractional snow-covered area within the catchment and ICESat-2 snow depths from outside the catchment improve the model's ability to capture the distribution of snow depths in the catchment. Model performance is particularly improved during the snow accumulation season when ICESat-2 data are available, and degrades as the dominant processes that dictate snow distribution shift from accumulation to ablation processes. The results of the study are interesting and the data assimilation approach appears to be a promising method to make the most use out of the sparse ICESat-2 tracks. I appreciate the detailed descriptions of agreement and disagreement between model outputs and observations. However, the writing can be a bit difficult to follow at times and I recommend that the authors make a number of revisions to the text and the figures in order to improve the manuscript.*

### Reply:

We appreciate the Reviewer's interest, time, and insightful comments. We are very grateful for the constructive suggestions that have helped us to make study better and more readable. The following provides a point-by-point response to the Reviewer's comments.

#### Major comments:

#### COMMENT # 1.2

*There are several places where references are located early in sentences and it is unclear if they apply to the entire sentence, or where there is no reference provided but it should be. I've listed a few lines here but please make sure references are clear throughout the text.*

- a. lines 17-18: Is Mott et al. (2018) for the entire sentence? If not, you need another reference to support everything that comes after its current location.*
- b. Lines 105-107: You say that most DA research on snow has focused on temporal data*

*assimilation with a few exceptions. You cite the exceptions but not the “most”.*

- c. Lines 118-119: The ATL03 data product is still be validated? You need to provide a reference here or remove the comment.*
- d. Lines 129-133: You need some references here for information about the watershed, such as the fraction of precipitation that falls as snow and total precipitation.*
- e. Lines 147-154: Neuenschwander et al. 2020 (<https://doi.org/10.1016/j.rse.2020.112110>) showed strong returns over snow for the weak beams. You should cite them here and I recommend you re- examine your weak beam data*

## **Reply:**

We thank the Reviewer for the detailed reading and checked the whole text for inappropriate or unclear references located early in sentences. Following are the detailed replies to the specific phrases:

- a. The reference is for the entire sentence, so we moved it to the end.
- b. Added a relevant reference at the end of the phrase where it is stated that most snow DA research focuses on purely temporal DA ([Giroto et al., 2020](#)).
- c. We find that ATL03 data can provide snow depths with ca. decimetric accuracy (see the conference presentation: [Treichler et al., 2023](#)). Some of the authors also have a publication in preparation about the validation of ICESat-2 measurements with drone data. We will either refer to the publication if it becomes available in time, or remove this part.
- d. Moved the citation to [Revuelto et al. \(2017\)](#) to the end of the sentences that refer to that paper.
- e. This is a valid point, we agree with the Reviewer that the weak beams may contain valuable information over bright, snow-covered terrain and should thus not be generally discarded. In [Neuenschwander et al. \(2020\)](#), ATL08 data is validated in the Finnish boreal forests, a terrain with little topographic relief. ATL08 splits photons in 100 m, while we work with 20 m cells, diminishing by a factor of five the number of photons available in one cell. There are also strong terrain differences between the mentioned study and the Izas study area, where a large average slope can negatively impact snow depth estimation in case of horizontal geolocation inaccuracy (3 to 4 meters; [Magruder et al., 2021](#)). Finally, only a fourth of the photons are available for the weak beams profiles (strong to weak beam energy ratio is 4; [Neumann et al., 2019](#)) compared to strong beams,

making the statistical estimation of snow depth less reliable. Such considerations made us discard the weak beams observations, but we consider adding them in the revised manuscript if they prove useful to the goals of the study.

---

#### COMMENT # 1.3

*The introduction is very long. I understand that the authors feel like they need to provide background on a number of topics in order to justify and explain their work, but the reader is left wondering where they are going with the work because the introduction is so long. I recommend that the introduction is shortened considerably. You could base each paragraph around the following topics: (1) Why it is important to know snow depths across watersheds, (2) ICESat-2 looks like it can be used to estimate snow depths along its flight tracks, albeit with fairly large uncertainties, but we need a way to spatially and temporally extrapolate, (3) data assimilation techniques have shown promise for extrapolation, (4) this study explores data assimilation of ICESat-2 snow depths and Sentinel-2 snow-covered area. Then you can move a lot of the extra detail on techniques to measure snow depth (currently lines 33-50 and then 51-63 on ICESat-2 details) and various data assimilation techniques (currently lines 76-114) to the supplement so readers who are not familiar with those topics have a resource to lean on without bogging down the reader who knows plenty about those topics.*

#### **Reply:**

We made the introduction shorter, and we thank the Reviewer for suggesting a nice paragraph structure for this section. We believe the introduction is now easier to read thanks in part to this suggestion.

---

#### COMMENT # 1.4

*This seems like something pretty minor but all figures should have letter labels. Right now you need to refer to some of them by location and it would be a lot easier if they were all consistently lettered.*

#### **Reply:**

We thank the Reviewer for this practical comment. We added the labels to the panels, and improved the references to the figures in the text.

---

#### COMMENT # 1.5

*When describing the use of ensemble members in the data assimilation section, you state that you perturb some forcing variables. Why were those specific variables perturbed? You describe the shape of the perturbation but not the magnitude. What were the ranges of perturbation magnitudes and how were they selected?*

### Reply:

We chose these variables (temperature, precipitation and longwave radiation) because perturbing them allows us to account for uncertainty in the forcing data and obtain an ensemble with a variety of possible scenarios for the seasonal snow evolution:

- the precipitation perturbation allows to locally adjust the snow accumulation or removal processes that are not explicitly modelled (e.g. wind redistribution);
- the perturbation to the temperature allows for different precipitation phase scenarios (liquid or solid) and modulates the sensible heat flux;
- the perturbation to the longwave radiation modulates the radiative part of the energy balance, thus modifying the internal energy and melt processes in the snowpack.

One should note that it is an equally acceptable choice to abandon the forcing formulation of DA and to instead infer a set of internal parameters of the snow model (FSM2). However, given our purpose of experimenting with a new set of remotely sensed observations, the choice of a reasonable set of parameters or another is irrelevant for the scope of the paper. The parameters for the perturbation applied to the forcing to generate the prior were previously only available from the configuration files uploaded in the zenodo repository [Mazzolini et al. \(2024\)](#), but to clarify we have now added the following Table 1 to Section 3.4 to fully describe the prior perturbation parameter distribution employed for each of the variables. The parameters were chosen based on previous studies' values ([Alonso-González et al., 2022, 2023](#)).

### Changes:

In the presented experiments, the perturbed forcing variables are air temperature, precipitation and downwelling longwave radiation. The perturbation parameters are time-invariant throughout the water year, and ~~the prior perturbation parameters are extracted via transformations are extracted~~ from a logit-normal distribution ~~rather than Gaussian, to restrict whose prior hyperparameters can be seen in Table 1.~~ We choose this distribution over a log-normal or a Gaussian distribution as the logit-normal restricts the perturbation within defined ~~bounds~~ ([Aalstad et al., 2018](#)),

(Guidicelli et al., 2023) upper and lower bounds, in contrast the other distributions which would have respectively only one or no bounds (Aitchison and Shen, 1980). The nature of the perturbation is multiplicative for the precipitation (in part to prevent non-physical negative values) and additive for the other variables.

Table 1: Hyperparameters for extraction of the logit-normally distributed prior perturbation parameters. A note for the DA-expert reader is that the hyperparameters  $\mu$  and  $\sigma$  are the mean and standard deviation, respectively, of the associated Gaussian distributions that the logit-transformed prior perturbation parameters follow. Numerical entries without units are implicitly dimensionless.

| Perturbed Variable | Type           | $\mu$ | $\sigma$ | Lower bound        | Upper bound       |
|--------------------|----------------|-------|----------|--------------------|-------------------|
| Precipitation      | Multiplicative | -0.9  | 0.7      | 0.1                | 5                 |
| Temperature        | Additive       | 0     | 0.5      | -8K                | 8K                |
| Longwave radiation | Additive       | 0     | 0.5      | -8Wm <sup>-2</sup> | 8Wm <sup>-2</sup> |

COMMENT # 1.6

The correlation length scale is stated as 1.5 in line 283. That is a unitless number. What does that equate to in terms of meters? Is it 30 m (1.5 grid cells)? Does that mean there is no correlation more than two times that distance away based on your explanation in line 280? There has been a lot of research on spatial correlation of snow depth and you need to tie your choice for this parameter to the literature. Right now you state that it was chosen to make the “size of the resulting neighborhoods acceptable”. Acceptable to who or based on what? I recommend looking at <https://agupubs.onlinelibrary.wiley.com/doi/10.1029/2020WR027343> and references therein regarding spatial correlation length scales. You could calculate variograms for your drone-based snow depths to determine the most appropriate scale for your study region.

**Reply:**

We thank the Reviewer for this astute question. This Comment, together with the following Comment and Reviewer 2 Comment 1.5, made it clear that we need to expand the explanation of the spatial transfer of information from the available ICESat-2 observations. We offer here an answer that will be incorporated in Section 3.5 of the revised paper.

The correlation length scale is unitless because it does not correspond to a geo-

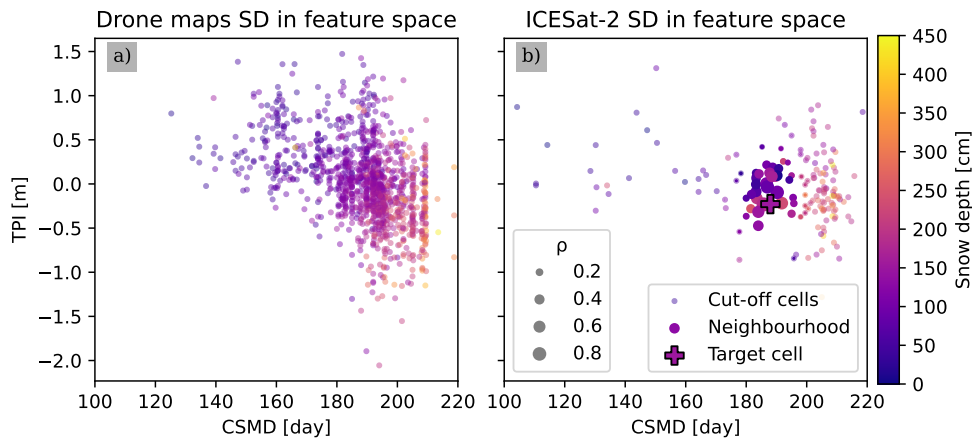

Figure 1: Panel a): scatterplot depicting the position of the cells from the drone maps in the feature space. This space – created with TPI and CSMD – is adopted to define the similarity between cells. The points are colored according to the snow depth observed with the drone. Panel b): ICESat-2 snow depth observations in the extended catchment, displayed in feature space, with snow depth-based coloring. The cross represents one cell from the drone domain where a snow depth of 150 cm was measured. The solid points are ICESat-2 data points included in the neighbourhood for this cell, with their size proportional to the correlation  $\rho$ .

graphical distance but to a distance in standardized multi-dimensional feature space, i.e. the similarity with regard to TPI and CSMD. In simpler words, information is transferred between cells that have similar convexity and average snow disappearance date.

To guide the reader in understanding this concept, we add to the revised manuscript an example showing how the neighbourhood is defined in the feature space, with the help of Figure 1 that you find below. Focus on panel b): there we exemplify a situation where a cell in the catchment with drone data – depicted therein with a cross – has to be updated. The solid points in the scatterplot are selected to be part of the neighbourhood, and all of them have influence on the Kalman update (see step 11 in Algorithm 1 of [Alonso-González et al., 2023](#)), used to update the local ensemble of the target grid cell. As cells closer in feature space to the target cell should have a larger influence, their  $\rho$  is larger, which can be appreciated by looking at the size of the scatter points.

#### COMMENT # 1.7

*The model has been described in more detail by the authors in their other publications that are cited in this manuscript, but it would be helpful to have a bit more detail in- places. For ex-*

ample, in lines 286-287 it is stated that ICESat-2 snow depths are “spatially propagated” but fSCA information is not. What does this mean exactly? In the spatial propagation section you describe certain parameters that can be extracted from digital elevation models and how they are calculated over various distances. But there isn’t a clear explanation of how the ICESat-2 data from outside the drone domain are spatially propagated. There is also no description of how the data are actually assimilated. Are the downscaled ERA5 data used to estimate snow patterns and then FSM2 adjustable parameters to better match the fSCA maps? Is this what you are trying to explain in line 302? Everything is fairly disconnected as is and the reader needs to have a general idea of how the modeling works without having to go back and read multiple other journal articles.

### Reply:

We thank the Reviewer for this constructive critique. The detailed explanation of the unclear topics greatly helped us to expand Section 3.5. Below, we try to answer the Reviewer’s individual questions:

- “For example, in lines 286-287 it is stated that ICESat-2 snow depths are “spatially propagated” but fSCA information is not. What does this mean exactly?” In purely temporal (no spatial propagation) ensemble-based data assimilation, the observation located in a cell is used for a comparison with the corresponding observable state variable to compute a direct update to the prior’s forcing perturbation parameter via an (ensemble) Kalman analysis step. For a more detailed explanation of this, see equation 6.37 to 6.39 in [Evensen et al. \(2022\)](#). In spatio-temporal data assimilation, the observations taken into account for updating the state in a certain cell, are all those that are located in the neighbourhood of the cell (see the updated Section 3.5 for an explanation of how the neighbourhood is defined). However, fSCA observations are spatially complete: hence every cell (or almost) has multiple observations of fSCA. As a consequence, we do not use other fSCA observations other than the local ones located in the cell itself to update the parameters in that cell. We hope to have clarified this in the updated version of Section 3.5
- “But there isn’t a clear explanation of how the ICESat-2 data from outside the drone domain are spatially propagated.” In contrast to what we just said about fSCA, we stated that we spatially propagate information from ICESat-2 observations. This means that when we update the perturbation’s parameter for any cell in the experimental catchment, part of the ICESat-2 observations (the ones falling into its neighbourhood) are used. Algorithm 1 in [Alonso-González et al. \(2023\)](#) contains the practical equations used for the spatio-temporal assimilation with the DES-MDA scheme. Here we highlight that when a cell is updated, the ob-

servations located in a cell which is close in the feature space will have a large correlation  $\rho$ , and hence have a large influence on the update, while observations located in a cell which is far (but still inside the neighbourhood) will have a small  $\rho$  and hence have limited influence in the update. We hope to have clarified this in the updated version of Section 3.5, and a visual example of this is offered in Figure 1.

- *"There is also no description of how the data are actually assimilated."* We use the assimilation algorithm DES-MDA, which is an iterative ('multiple data assimilation' or MDA) and so-called deterministic (non stochastic) version of the ES. In short, this iterative assimilation algorithm performs a form of likelihood tempering by inflating the observation's standard deviation, so as to divide the update in multiple iterative smaller update steps – without violating Bayes' theorem – and leading to better performance with nonlinear models. The deterministic (also known as square root) nature of this ensemble Kalman scheme simplifies the numerics since it does not involve perturbations in observation space while also leading to improved performance with a smaller ensemble size. We will modify Section 3.4 to point the reader to [Alonso-González et al. \(2022\)](#) and [Alonso-González et al. \(2023\)](#) where the practical implementation of this algorithm is described.
- *"Are the downscaled ERA5 data used to estimate snow patterns and then FSM2 adjusts the tunable parameters to better match the fSCA maps? Is this what you are trying to explain in line 302?"* ERA5 data is topographically downscaled and used (together with the prior perturbation parameters) to run an ensemble of FSM2 simulations in every cell. In the assimilation of fSCA it is possible to imagine every cell independently from its neighbours. As we are using what is usually called forcing formulation of DA, the updates (or you can think of them as adjustments) are applied directly to the forcing perturbation's parameters and subsequently indirectly to the model states by re-running the model with updated perturbed forcing. We try to give a practical example with how the assimilation of fSCA would influence the perturbation parameters. First, an ensemble of FSM2 simulations is run over a cell. We will take the time point of the observation, and use the distribution (represented by the ensemble) of predicted fSCA to compare with the observed fSCA. At this point an update of the perturbation parameters is computed in such a way that the updated perturbations will be sampled around those perturbations values that led to a predicted fSCA similar to the observed fSCA. The ensemble simulation with the updated perturbation parameters will lead to a fSCA simulation closer to the observation. While this is only an example, DA algorithms such as the ES-MDA we use



have already been tested for assimilating various snow observations in many studies (see [Alonso-González et al., 2022](#), and references therein).

#### COMMENT # 1.8

*Figure 4-6: I really like that all the ensemble member's basin-averaged snow timeseries are shown in these figures, I like the color palette for the maps, and I like that the colors from the maps carry over into the histograms. That said, I think it is a bit of wasted space to keep showing the done map and histogram in every figure, especially since the map is also in Figure 1. I recommend showing a different map in Figure 1 to provide some added context and then merging these three figures into one multi-panel figure. In the merged figure, you could have the first column contain the legend for all the basin-averaged ensemble time series (which should be the same for all experiments but it is not) and then the drone peak snow map in the middle and drone peak snow histogram at the bottom. Then columns 2-4 would be the basin-averaged ensemble time series on top, snow depth map in the middle, and snow depth histogram on the bottom for experiments (C), (D), and (J). This would minimize redundancy and allow the reader to visually compare results a lot more easily.*

#### Reply:

We thank the Reviewer for this Comment and agree that the multi-panel Figure 2 (included below) is a better way to compare the three experiments' results while avoiding redundancy. The map in the original manuscript's Figure 1 has a finer resolution than the one shown in the results, we believe it provides the most useful information in this context compared to snow depth maps from other time steps.

#### Minor Comments:

#### COMMENT # 1.9

*Line 17: "by strong" and a comma after "processes"*

#### Reply:

Changed, see answer for Comment 1.10

#### COMMENT # 1.10

*Line 18: "and metamorphism"*

#### Reply:

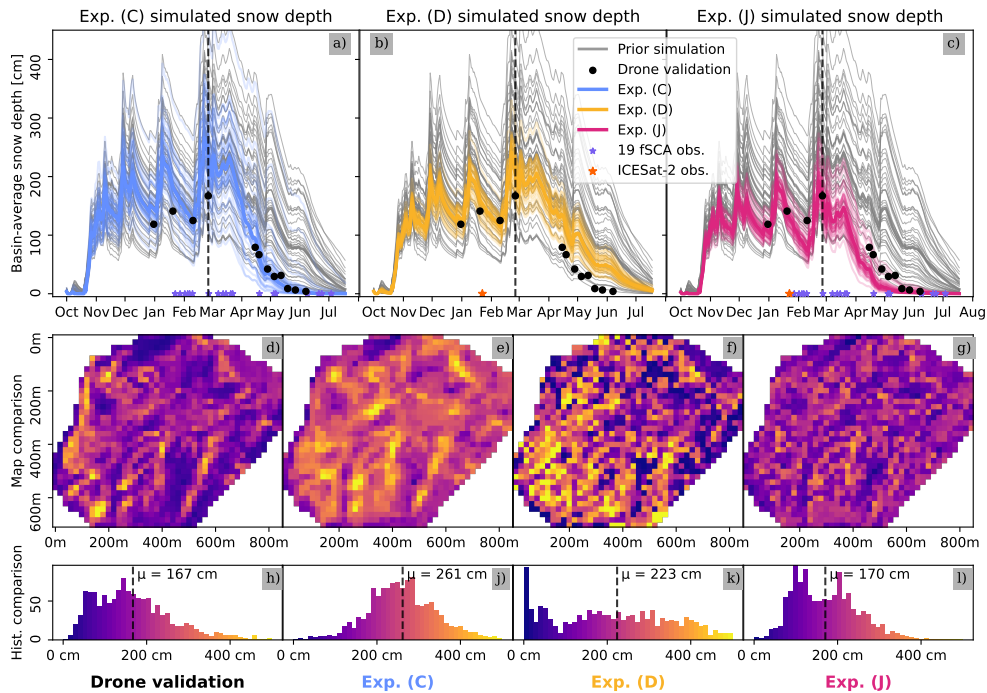

Figure 2: Panels a), b) and c) show the prior (gray) and posterior ensemble simulations (colored) as catchment-average snow depths over the whole water year for experiment C, D, J, respectively. The black points are the drone-based snow map averages serving as validation data. The blue and orange stars show the timing of the fSCA and/or snow depth observations, respectively, that are assimilated in each experiment. Panels d), e) and f): simulated snow depths are shown as heat maps for the 11.03.2020 (date shown with a vertical dashed line in panels above) for a representative ensemble member that is nearest to the ensemble median catchment average snow depth for experiment C, D, J, respectively. Panel d): the corresponding 11.03.2020 drone-based snow depth heat map at the model's spatial resolution (20 m). Panels h), j), k) and l) below showing snow depth histograms corresponding to the (and defining the color maps of) the heat maps in the panels above.

The introduction has largely changed and the corresponding part is rewritten as follows:

### Changes:

Seasonal snow is characterized by a crucial variable for sustaining human life and an essential climate regulator (Sturm et al., 2017). It is characterized by strong spatial and temporal variability (Mott et al., 2018) arising which arises from several pro-

cesses such as preferential deposition, wind transport, differential radiation and heat fluxes ~~7-metamorphism~~ and metamorphism (Mott et al., 2018).

COMMENT # 1.11

*Lines 23-24: Either remove this sentence with the Dozier reference or rephrase. Currently it doesn't fit with the rest of the paragraph.*

**Reply:**

---

Removed.

---

COMMENT # 1.12

*Lines 34-37: Something odd seems to have happened with the formatting here. The Foster reference seems to be thrown into the middle of this very long sentence and the sentence does not make sense.*

**Reply:**

---

We thank the Reviewer for spotting this. This part of the introduction has been greatly condensed.

---

COMMENT # 1.13

*Lines 36-37: "where mountain regions are masked out" hangs on at the end of this sentence like an afterthought but it is an important point. Rephrase to emphasize.*

**Reply:**

---

The description of the state-of-the-art snow remote sensing has been removed from the introduction as suggested in Comment 1.3.

---

COMMENT # 1.14

*Line 49: The coarse footprint of ICESat?*

**Reply:**

---

Yes, that's what we meant. This part of the introduction has been rewritten.

---

COMMENT # 1.15

*Line 52: Significantly better sensor characteristics than what?*

**Reply:**

We meant that ICESat-2 has better characteristics than its predecessor ICESat in terms of spatial resolution. However, we removed this phrase from the introduction.

COMMENT # 1.16

*Line 56: Rephrase to “measurement error on flat terrain” instead of having part of the description in parentheses.*

**Reply:**

Thank you, we modified this as follows:

**Changes:**

The geolocated photons have a centimetric vertical measurement error (although on flat terrain (Markus et al., 2017) and ,while the horizontal accuracy is estimated at 3 to 4 m (Magruder et al., 2021).

COMMENT # 1.17

*Lines 64-83: There is a lot of extra information packed into parentheses in these paragraphs. Revise the sentences so that most information is written into the sentence. The use of parentheses makes it more difficult to read. For example, just say “obtaining statistically optimal estimates” on line 77.*

**Reply:**

We improved readability in the revised manuscript by avoiding parentheses: We removed the phrase between parentheses at line 65-66 and removed the parentheses at line 77. Lines 80-84 were removed in the larger restructuring of the introduction.

COMMENT # 1.18

*Line 89: Either keep “despite” or “thanks to” in the sentence but do not include them both with one in parentheses*

**Reply:**

---

This phrase was removed in the larger restructuring of the introduction.

---

COMMENT # 1.19

*Line 110: Rephrase to “In contrast, Alonso-González et al. (2023) have shown...”*

**Reply:**

---

Rephrased as suggested.

---

COMMENT # 1.20

*Line 114: Add a space after ICESat-2.*

**Reply:**

---

We thank the Reviewer for spotting it, added.

---

COMMENT # 1.21

*Figure 1: The use of dashed lines to show the zoomed in areas is confusing because the ICESat-2 tracks are also dashed lines. I recommend using solid lines for the zooms or the tracks.*

**Reply:**

---

We thank the Reviewer for this suggestion, we will change the line style in the figure to improve readability.

---

COMMENT # 1.22

*Lines 141-160: There is a lot of information repeated here that was already in the introduction. You don't need to provide all the details of ICESat-2, just the ones that are important for your work. Then you only need to include them in one place.*

**Reply:**

---

The Reviewer is right, in the revised manuscript we take care to avoid repetitions. We introduce ICESat-2 briefly in the introduction and provide further details essential to understand the method in the data section.

---

COMMENT # 1.23

*Line 170: Replace “harvests” with “hosts”*

**Reply:**

Replaced.

COMMENT # 1.24

*Line 184: Why select 60%? How sensitive are your results to a different threshold?*

**Reply:**

The 60% mark was chosen after inspecting the photon snow depth profiles visually and applying several thresholds. For the two profiles in our study, it was found to effectively remove noise photons having few neighbours while preserving most photons reflected from the snow surface – as photons cluster along the continuous surface. Noise photons stemming from the atmosphere, double bounces, and photons scattered in the snowpack before being reflected back to ICESat-2 are removed. Keeping a larger proportion of the photons leads to a more complete profile, but at the cost of a increasing the number of outliers, and keeping fewer photons would produce data gaps in the snow surface profile. The profiles used in this study are relatively short and were thus thoroughly checked for quality and completeness. However, we recommend a sensitivity test or possibly multiple thresholds for future applications in larger study sites where ICESat-2 profiles from different overpasses are included and manual checks of all data is not possible. The 60% was as an appropriate proportion for the specific average slope and solar radiation at the time of acquisition but may not fit other sites and acquisition conditions (e.g., night acquisitions, haze or blowing snow conditions, different slopes or snow reflectivity).

COMMENT # 1.25

*Line 195: Why bring up the orbit of the satellite here? What do you mean by “footprint”?*

**Reply:**

The orbit was mentioned to remind the reader that the profiles are not directed north-south but slightly inclined. The footprint is the size of the Earth’s surface illuminated by one pulse of the ICESat-2 laser (ca. 14 m in diameter), we adjusted the text in section 2 to clarify this. Here, we point to this to remind the reader of the width of the profile. Line 195 has been rewritten to clarify how the photons, grid and profile

geometries fit together.

COMMENT # 1.26

*Line 197-198: This is an incomplete thought. You filter out the cells with steep slopes?*

**Reply:**

Apologies, this phrase was not complete.

**Changes:**

In addition, also the cells with an average slope larger than  $40^\circ$  are filtered out, as the horizontal positioning uncertainty makes snow depth retrievals less reliable for steep terrain.

COMMENT # 1.27

*Figure 2: I like the idea of this figure but I cannot see the gray “ground photons” in the top panel. Consider revising the figure so the very top panel shows all the data, a middle panel shows all the photon differences with respect to the DEM, and the bottom panel stays as is. You would remove the right panel.*

**Reply:**

Thank you for this suggestion. We will revise the figure.

COMMENT # 1.28

*Line 211: “20 m spatial resolution of the simulations 3.6”? I think the 3.6 should be totally removed but this also makes me realize that you describe all the data you will assimilate before you really describe the basic model. You might want to flip that order, moving 3.3 to the top of the methods, because you refer to the spatial resolution of the simulations before you describe them.*

**Reply:**

We thank the reviewer, we removed the 3.6 reference from line 211 and also flip the subsections, as we agree it makes the paper more readable.

COMMENT # 1.29

Lines 213-217: These sentences on the uncertainty are very confusing. You list a sigma of 0.34 on line 213 and then again on line 217. Are these the same uncertainty metric or are they different metrics that miraculously have the same value? If they are the same, only list it once.

**Reply:**

Yes, the metrics were the same. We aimed at showing how we computed our uncertainty estimate. We remove 0.34 from line 217 and simplify this part:

**Changes:**

We estimate the observation error for the fSCA retrievals at 20 m resolution to be  $\sigma = 0.34$ . ~~As independent~~ Independent validation estimated the observation error  $\sigma_N$  at 100 m resolution to be equal to  $\sigma_N = 0.07$  (see Table 2 [Aalstad et al., 2020](#)), ~~we expect~~. We obtained our 20 m  $\sigma$  estimate using that the error at coarser ~~resolution to improve resolutions should increase at higher resolutions~~ according to the central limit theorem  ~~$\sigma_N = \frac{\sigma}{\sqrt{N}}$ , where N through  $\sigma = \sigma_N \sqrt{N}$ , where N = 25~~ is the number of independent 20 m cells ~~being aggregated contained~~ in the coarser (100 m) validation. ~~validation (N = 25 in this case). Thus, the disaggregated observation error at 20 m resolution for these fSCA retrievals should be on the order  $\sigma = \sigma_N \sqrt{N} \simeq 0.34$  from which we obtained our estimate.~~

COMMENT # 1.30

Line 222: Replace “7” with “seven”

**Reply:**

Replaced.

COMMENT # 1.31

Line 222: Do you mean that you select the most spatially detailed versions of parameterizations that you can use? Or the most mathematically complex? Or something else?

**Reply:**

FSM2 has two or three levels of representation for each of the physical process we mention in the lines 223-226, where one is very simple and the other is more complex. To explain this better we change the phrase to:

**Changes:**



~~To obtain a more comprehensive snowpack representation,~~<sup>7</sup> ~~In FSM2, seven~~ physical processes are ~~parameterized with the most detailed process representation among those available in the snow model.~~ represented with multiple available process parameterizations. We choose the most complex representation for all the processes to obtain a more comprehensive snowpack ensemble simulation.

COMMENT # 1.32

*Lines 223-226: For all of these parameterizations, I would simply say “as a function of” rather than “depending on”, “influenced by”, “diagnosed by”, etc.*

**Reply:**

Agreed, we change the phrasing except for the statement about the turbulent fluxes where the inputs to the coupled functional relationships in the Monin-Obukhov similarity theory are omitted for brevity.

**Changes:**

These parametrizations are: albedo decay with elapsed time since the last significant snowfall, thermal conductivity ~~depending on~~ as a function of snow density, density ~~influenced by~~ as a function of overburden and metamorphism, turbulent fluxes diagnosed using the Monin-Obukhov similarity theory, and melt-water percolation ~~depending on~~ as a function of gravitational drainage, fractional snow cover asymptotic to snow depth.

COMMENT # 1.33

*Line 232: Why is 400 appropriate?*

**Reply:**

We thank the Reviewer for the question. We downscale the ERA5 forcing to the extended catchment (see panel a) of Figure 1 in the original manuscript), approximately sized 5 km by 3 km. The topographical downscaling works by grouping the cells in a number of clusters with similar topographic metrics such as complexity, aspect, slope and others. You can see more details about this in [Fiddes and Gruber \(2012\)](#). In that work, it was shown that an entire ERA5 grid cell (25 km) was split in as little as 100 clusters while capturing first order hillslope scale variability in the atmospheric forcing and the resulting cryospheric simulations. Our choice of 400 clusters is a considerably larger number and is chosen to confidently ensure that hillslope-induced variability in the forcing data is captured for a considerably smaller area than an

entire ERA5 grid cell. Note that this number doesn't influence the later snow simulations, but is only used for downscaling to generate the atmospheric forcing.

#### COMMENT # 1.34

*Line 236: I am a bit confused by this sentence. If you are looking at figure 1, do you mean that you downscale for each cell in that large spatial domain in the left-most map? Based on your number of cells it seems unlikely. Your description does not sound like you only cover the small drone-based area. Do you also downscale to all the cells underlying all the ICESat-2 tracks or just those two highlighted tracks?*

#### Reply:

We thank the Reviewer for the question. TopoSCALE downscales the forcing in a semi-distributed manner, so the forcing is downscaled for a number of clusters with a certain topographic signature each (400 here), representing the entire domain. These can then be mapped back to the full grid — but only some cells are simulated by the snow model, the drone-mapped area and the two ICESat-2 highlighted tracks.

#### Changes:

The obtained semi-distributed forcing is then mapped back to ~~the a~~ 20 m fully distributed grid. ~~Such a combination of topographic downscaling covering the whole extended domain providing forcing data for a selection of cells. We now select only the cells covering the drone maps in the Izas experimental catchment (solid black line in Figure 1) and the grid cells in the extended domain that are intersected by the ICESat-2 tracks (blue lines in Figure 1), summing up to a total of ~ 1900 cells for which the FSM2 model is run. ...~~

#### COMMENT # 1.35

*Line 239: This is the first mention of "the prior". Presumably this means the model simulation with zero data assimilation. That needs to be defined either in this data assimilation section or in the more generic modelling section.*

#### Reply:

We thank the Reviewer for noticing this. We added a definition at the beginning of Section 3.4 that can be seen in the answer to Comment 1.41.

#### COMMENT # 1.36

Line 242: “log-normal” instead of “logit-normal”?

#### Reply:

We have used a logit-normal (also known as a logistic normal) distribution [Aitchison and Shen \(1980\)](#), which is a distribution with both upper and lower bounds, while a log-normal distribution would only have a lower bound — which is not as useful for parameters that have multiple physical constraints. A table showing the distribution hyper-parameters was added to the manuscript and in the reply to Comment 1.5.

#### Changes:

... The perturbation parameters are time-invariant throughout the water year, and ~~the prior perturbation parameters~~ are extracted via transformations from a logit-normal distribution ~~rather than Gaussian, to restrict whose prior hyper-parameters can be seen in Table 1. We choose this distribution over a log-normal or a Gaussian distribution as the logit-normal restricts~~ the perturbation within defined ~~bounds (Aalstad et al., 2018; Guidicelli et al., 2023)~~ upper and lower bounds, in contrast the ~~others which would have respectively only one or no bounds (Aitchison and Shen, 1980)~~.

#### COMMENT # 1.37

Line 247: How is it “clearly non-linear”? Is that an interpretation based on manual inspection? Is that explained in previous literature?

#### Reply:

The modeled relation between input forcing and observable state (fSCA or snow depth) realized through FSM2 is non-linear in several ways. One example is the snow/water phase change at zero degrees, as can be illustrated by the following example of the relation between longwave radiation and snow depth. A positive perturbation (i.e. more incoming radiation) has no effect on the snow depth until the point in the season when the snowpack becomes isothermal and starts melting, while it has a large impact after this point in time. Another example is the relationship between temperature and precipitation and their non-linear effect on snow depth: a positive temperature perturbation leading to liquid precipitation will cause snowdepth to remain null or decrease due to changes in density and crystal structure, while for lower temperatures (and, consequently, solid precipitation) a perturbation will cause no further increase/decrease in snowdepth. Another way to verify the

non-linearity can be found in [Essery \(2015\)](#), where one can clearly see how many non-linear functions are used to define the relation between atmospheric input and observable states such as fSCA and snow depth.

COMMENT # 1.38

*Figure 3: Rearrange the panels, and add letter labels, so that they go from left to right according to the order that each variable is described in the text: TPI, Sx, then CSMD.*

**Reply:**

Changed

COMMENT # 1.39

*Line 311: Explicitly state their measurement uncertainty.*

**Reply:**

We can estimate the uncertainty for the drone maps at 20 m resolution with the central limit theory, obtaining conservatively a centimetric accuracy. Note that this estimation implies the hypothesis of independent identically distributed measurement errors, which is not respected when the errors are spatially correlated. So we degraded the estimation of 1 order of magnitude, obtaining a "conservative" estimate.

**Changes:**

Their measurement error ~~is typically one order of magnitude lower than the uncertainty in the snow-pack reconstruction, as we resample~~ can conservatively be estimated at about 1 cm as we have resampled the snow depth maps to the modelling resolution (from 1 m to 20 m) with the averaging operator.

COMMENT # 1.40

*Line 321: "selected by the median operator"? Does this mean the map with the median snow depth out of all ensemble members?*

**Reply:**

Yes, the Reviewer is correct. We realize the phrasing here was a bit complicated, and tried to clarify this in the text. The spatially distributed median of all ensemble members is not a representative model output since it would show values from a different member for each point in space, hence mixing up different model runs. To pick a

single model ensemble member, we compute the spatial average of all the member's maps for the 11th of March, and then pick the median snow depth member. This ensures that the reference member is representative for the model ensemble mean while corresponding to an actual model run.

### Changes:

Since the result of the DA problem is a spatially correlated ensemble representing a statistical distribution, we show one single ensemble member simulation in order to appreciate the spatial structure embedded in the simulation. ~~We~~ To choose the representative member, we first select the simulation state on 11th of March as this is the closest drone acquisition to the peak-SWE. Then we spatially average the ensemble members and pick the ~~member whose average snow depth state is selected by the median operator for the 11th of March.~~ median of those spatial averages.

COMMENT # 1.41

*Lines 409-242: Here is where "the prior" comes up repeatedly but it was never well defined. Please address my earlier comment so the reader can more easily follow this discussion.*

### Reply:

We added a definition of prior simulation at the beginning of Section 3.4 so the reader can now follow:

### Changes:

... Therein, the prior ~~uncertainty~~ distribution – a probabilistic distribution representing uncertainty over the system's state and parameter space before observations are taken into account – is represented by the spread of ~~the~~ a finite collection of samples known as ensemble members. ~~Each~~ This spread in terms of basin-average snow depth can be seen in the gray trajectories of panels a), b) and c) of Figure 2. Each prior ensemble member is an FSM2 simulation obtained by perturbing a selection of forcing variables.

COMMENT # 1.42

*Lines 475-490: I am not a data assimilation expert so found the repeated use of "hyper" to be confusing here. You mention hyperparameters as earlier in the text, which is fine, but you also refer to a hyperprior and say the experiments are almost hyper. Does this all just mean high spatial resolution?*

### Reply:

---

We thank the Reviewer for this comment, hyper was used with two different meanings for model parameters and spatial resolution. In modelling, hyperparameters refer to high level parameters controlling the statistical distribution of lower level parameters. In the paper, this is used for the prior hyperparameters that control the extraction of the spatially correlated prior. Due to computational limitations snow models are often run at a spatial resolution that may seem coarse to the observation/field measurements community. In this context, 20 m corresponds to a very high resolution that is often referred to as hyper-resolution. We opt for keeping these two meanings, but the reader will be able to distinguish the two contexts as in the first is written without hyphenation (hyperparameter), while we add the hyphen when talking about spatial resolution (e.g. hyper-resolution).

---

## REFERENCES

- Aalstad, K., Westermann, S., Schuler, T., Boike, J., and Bertino, L.: Ensemble-based assimilation of fractional snow-covered area satellite retrievals to estimate the snow distribution at Arctic sites, *The Cryosphere*, 12, 247–270, <https://doi.org/10.5194/tc-12-247-2018>, 2018.
- Aalstad, K., Westermann, S., and Bertino, L.: Evaluating satellite retrieved fractional snow-covered area at a high-Arctic site using terrestrial photography, *Remote Sensing of Environment*, 239, 111 618, <https://doi.org/10.1016/j.rse.2019.111618>, 2020.
- Aitchison, J. and Shen, S. M.: *Logistic-Normal Distributions: Some Properties and Uses*, *Biometrika*, 67, 261–272, <https://doi.org/10.2307/2335470>, publisher: [Oxford University Press, Biometrika Trust], 1980.
- Alonso-González, E., Aalstad, K., Baba, M. W., Revuelto, J., López-Moreno, J. I., Fiddes, J., Essery, R., and Gascoïn, S.: The Multiple Snow Data Assimilation System (MuSA v1.0), *Geoscientific Model Development*, 15, 9127–9155, <https://doi.org/10.5194/gmd-15-9127-2022>, 2022.
- Alonso-González, E., Aalstad, K., Pirk, N., Mazzolini, M., Treichler, D., Leclercq, P., Westermann, S., López-Moreno, J. I., and Gascoïn, S.: Spatio-temporal information propagation using sparse observations in hyper-resolution ensemble-based snow data assimilation, *Hydrology and Earth System Sciences*, 27, 4637–4659, <https://doi.org/10.5194/hess-27-4637-2023>, 2023.
- Essery, R.: A factorial snowpack model (FSM 1.0), *Geoscientific Model Development*, 8, 3867–3876, <https://doi.org/10.5194/gmd-8-3867-2015>, 2015.

- Evensen, G., Vossepoel, F. C., and van Leeuwen, P. J.: Data Assimilation Fundamentals: A Unified Formulation of the State and Parameter Estimation Problem, Springer Textbooks in Earth Sciences, Geography and Environment, Springer International Publishing, Cham, <https://doi.org/10.1007/978-3-030-96709-3>, 2022.
- Fiddes, J. and Gruber, S.: TopoSUB: a tool for efficient large area numerical modelling in complex topography at sub-grid scales, *Geoscientific Model Development*, 5, 1245–1257, <https://doi.org/10.5194/gmd-5-1245-2012>, 2012.
- Giroto, M., Musselman, K. N., and Essery, R. L. H.: Data Assimilation Improves Estimates of Climate-Sensitive Seasonal Snow, *Current Climate Change Reports*, 6, 81–94, <https://doi.org/10.1007/s40641-020-00159-7>, 2020.
- Guidicelli, M., Aalstad, K., Treichler, D., and Salzmann, N.: A Combined Data Assimilation and Deep Learning Approach for Continuous Spatio-Temporal SWE Reconstruction from Sparse Ground Tracks, <https://doi.org/10.2139/ssrn.4489553>, 2023.
- Magruder, L., Brunt, K., Neumann, T., Klotz, B., and Alonzo, M.: Passive Ground-Based Optical Techniques for Monitoring the On-Orbit ICESat-2 Altimeter Geolocation and Footprint Diameter, *Earth and Space Science*, 8, e2020EA001414, <https://doi.org/10.1029/2020EA001414>, [\\_eprint: https://onlinelibrary.wiley.com/doi/pdf/10.1029/2020EA001414](https://onlinelibrary.wiley.com/doi/pdf/10.1029/2020EA001414), 2021.
- Markus, T., Neumann, T., Martino, A., Abdalati, W., Brunt, K., Csatho, B., Farrell, S., Fricker, H., Gardner, A., Harding, D., Jasinski, M., Kwok, R., Magruder, L., Lubin, D., Luthcke, S., Morison, J., Nelson, R., Neuenschwander, A., Palm, S., Popescu, S., Shum, C. K., Schutz, B. E., Smith, B., Yang, Y., and Zwally, J.: The Ice, Cloud, and land Elevation Satellite-2 (ICESat-2): Science requirements, concept, and implementation, *Remote Sensing of Environment*, 190, 260–273, <https://doi.org/10.1016/j.rse.2016.12.029>, 2017.
- Mazzolini, M., Kristoffer, A., and Désirée, T.: Inputs (forcing, observations and config file) for the experiments included in "Spatio-temporal snow data assimilation with the ICESat-2 laser altimeter"., <https://doi.org/10.5281/zenodo.11176897>, 2024.
- Mott, R., Vionnet, V., and Grünewald, T.: The Seasonal Snow Cover Dynamics: Review on Wind-Driven Coupling Processes, *Frontiers in Earth Science*, 6, URL <https://www.frontiersin.org/articles/10.3389/feart.2018.00197>, 2018.
- Neuenschwander, A., Guenther, E., White, J. C., Duncanson, L., and Montesano, P.: Validation of ICESat-2 terrain and canopy heights in boreal forests, *Remote Sensing of Environment*, 251, 112 110, <https://doi.org/10.1016/j.rse.2020.112110>, 2020.

- Neumann, T. A., Martino, A. J., Markus, T., Bae, S., Bock, M. R., Brenner, A. C., Brunt, K. M., Cavanaugh, J., Fernandes, S. T., Hancock, D. W., Harbeck, K., Lee, J., Kurtz, N. T., Luers, P. J., Luthcke, S. B., Magruder, L., Pennington, T. A., Ramos-Izquierdo, L., Rebold, T., Skoog, J., and Thomas, T. C.: The Ice, Cloud, and Land Elevation Satellite – 2 mission: A global geolocated photon product derived from the Advanced Topographic Laser Altimeter System, *Remote Sensing of Environment*, 233, 111325, <https://doi.org/10.1016/j.rse.2019.111325>, 2019.
- Revuelto, J., Azorin-Molina, C., Alonso-González, E., Sanmiguel-Vallelado, A., Navarro-Serrano, F., Rico, I., and López-Moreno, J. I.: Meteorological and snow distribution data in the Izas Experimental Catchment (Spanish Pyrenees) from 2011 to 2017, *Earth System Science Data*, 9, 993–1005, <https://doi.org/10.5194/essd-9-993-2017>, publisher: Copernicus GmbH, 2017.
- Sturm, M., Goldstein, M. A., and Parr, C.: Water and life from snow: A trillion dollar science question, *Water Resources Research*, 53, 3534–3544, <https://doi.org/10.1002/2017WR020840>, \_eprint: <https://onlinelibrary.wiley.com/doi/pdf/10.1002/2017WR020840>, 2017.
- Treichler, D., Mazzolini, M., Piermattei, L., Webster, C., and Girod, L.: Spaceborne snow depth measurements from ICESat-2 laser altimetry, EARSel workshop 2023: Remote Sensing of the Cryosphere. Bern, Switzerland, URL [https://www.earsel.org/SIG/Snow-Ice/files/Abstracts\\_EARSEL\\_2023\\_FINAL.pdf](https://www.earsel.org/SIG/Snow-Ice/files/Abstracts_EARSEL_2023_FINAL.pdf), 2023.
